# Supplementary material for: Dietary Sphingomyelin Lowers Hepatic Lipid Levels and Inhibits Intestinal Cholesterol Absorption in High-Fat-Fed Mice
Source: PLoS One. 2013 Feb 7;8(2):e55949. doi: 10.1371/journal.pone.0055949 (PMC3567029; doi:10.1371/journal.pone.0055949)
Supplement: Table S2 — epatic lipid species in mice fed a high-fat diet with or without SM. Male mice were fed a high-fat diet without (HF) or with HFSM (0.6% wt/wt) for 4 weeks. Hepatic lipid species were quantified by ESI-MS/MS as described in “Methods”. Values represent means ± SEM. Percentage difference between groups is given in italics. Significant difference between HF and HFSM groups were analysed by Student's t-test: * P<0.05, † Pcorrected<0.05. (XLS) [file pone.0055949.s002.xls]

## Sheet: Sheet1
		HF	HFSM 0.6%	Difference	p-value	p value(Benjamini-Hochberg Corrected)
		(n = 8)	(n = 10)
Type	Name	nmol/mg protein	nmol/mg protein
Gene	ABCA1	1 ± 0.03	0.72 ± 0.03 †	-0.284874	0.000208338	0.00112926
Gene	ABCG1	1.03 ± 0.09	0.44 ± 0.02 †	-0.575703	1.70188e-06	5.10564e-05
Gene	ABCG5	1.04 ± 0.11	0.58 ± 0.03 †	-0.443614	0.000323488	0.00121308
Gene	ABCG8	1.01 ± 0.06	0.69 ± 0.02 †	-0.314098	1.56949e-05	0.000156949
Gene	LDLr	1.02 ± 0.09	0.74 ± 0.04 †	-0.278633	0.00393651	0.00787303
Gene	SR-B1	1.01 ± 0.05	0.9 ± 0.05	-0.108247	0.111392	0.13924
Gene	HMGCoAR	1.02 ± 0.07	1.02 ± 0.06	0.00332514	0.971607	0.971607
Gene	HMGCoASyn	1.05 ± 0.13	0.82 ± 0.08	-0.221497	0.130996	0.151149
Gene	PLTP	1.07 ± 0.13	0.56 ± 0.03 †	-0.471704	0.000772311	0.00250752
Gene	FAS	1.04 ± 0.11	0.65 ± 0.06 †	-0.378094	0.00578153	0.0108404
Gene	ACC	1.04 ± 0.11	0.54 ± 0.04 †	-0.476583	0.000306911	0.00121308
Gene	ELOVL5	1.06 ± 0.14	0.62 ± 0.06 †	-0.415689	0.00618306	0.0109113
Gene	ELOVL6	1.03 ± 0.09	0.71 ± 0.06 †	-0.312375	0.0080194	0.0133657
Gene	SCD1	1.04 ± 0.11	0.7 ± 0.08 †	-0.327818	0.0139615	0.0209423
Gene	DGAT2	1.04 ± 0.1	0.99 ± 0.04	-0.0402373	0.681631	0.705135
Gene	ACO	1.03 ± 0.09	0.47 ± 0.06 †	-0.541929	2.19012e-05	0.000164259
Gene	CYP4A10	1.02 ± 0.08	0.83 ± 0.07	-0.186221	0.120155	0.144186
Gene	CPT1a	1.01 ± 0.06	0.78 ± 0.04 †	-0.232086	0.00255798	0.0054968
Gene	MCAD	1.06 ± 0.14	0.89 ± 0.07	-0.161594	0.260573	0.289526
Gene	VLCAD	1.05 ± 0.12	0.8 ± 0.04	-0.233002	0.0507424	0.0691942
Gene	SPTLC2	1.02 ± 0.07	0.72 ± 0.02 †	-0.296449	0.000225852	0.00112926
Gene	CERS2	1.04 ± 0.11	0.82 ± 0.02 *	-0.208775	0.041917	0.0598814
Gene	CERS5	1.06 ± 0.13	0.64 ± 0.02 †	-0.392659	0.00232121	0.0054968
Gene	SMPD1	1.01 ± 0.05	0.94 ± 0.04	-0.0686334	0.293151	0.31409
Gene	SMPD3	0.92 ± 0.04	0.61 ± 0.07 †	-0.341485	0.00211585	0.0054968
Gene	LXRalpha	1.02 ± 0.07	0.8 ± 0.01 †	-0.21185	0.00256517	0.0054968
Gene	SREBP2	1.01 ± 0.05	0.65 ± 0.02 †	-0.36062	7.42199e-06	0.00011133
Gene	SREBP-1c	1.05 ± 0.12	0.58 ± 0.04 †	-0.442408	0.000835839	0.00250752
Gene	PPARalpha	1.03 ± 0.1	0.86 ± 0.05	-0.170411	0.101396	0.132256
Gene	ChREBP	1.04 ± 0.11	0.68 ± 0.08 †	-0.346651	0.0132844	0.0209423
Lipid	Cer 16:0	140 ± 15	104 ± 7 *	-0.259529	0.0328607	0.0953424
Lipid	Cer 18:0	29 ± 3	26 ± 2	-0.0954645	0.396355	0.544328
Lipid	Cer 20:0	46 ± 4	41 ± 3	-0.108093	0.362788	0.515133
Lipid	Cer 22:0	271 ± 32	290 ± 26	0.0697537	0.648848	0.73441
Lipid	Cer 24:0	241 ± 19	228 ± 18	-0.056286	0.606984	0.706433
Lipid	Cer 24:1	460 ± 39	323 ± 24 †	-0.298521	0.0065445	0.0354781
Lipid	MHC 16:0	100 ± 17	72 ± 6	-0.278295	0.1079	0.224519
Lipid	MHC 18:0	9 ± 2	8 ± 1	-0.189772	0.489774	0.607791
Lipid	MHC 20:0	36 ± 5	35 ± 4	-0.0433225	0.811632	0.861836
Lipid	MHC 22:0	191 ± 16	217 ± 25	0.133577	0.426999	0.563637
Lipid	MHC 24:0	159 ± 20	140 ± 11	-0.116625	0.401916	0.546163
Lipid	MHC 24:1	169 ± 31	98 ± 9 *	-0.420658	0.0284446	0.0907799
Lipid	DHC 16:0	12 ± 2	8 ± 1	-0.318033	0.0941529	0.203119
Lipid	DHC 22:0	13 ± 2	11 ± 2	-0.160654	0.374575	0.524915
Lipid	DHC 24:0	6 ± 2	5 ± 1	-0.0587983	0.988879	0.996367
Lipid	DHC 24:1	14 ± 2	8 ± 1 *	-0.442432	0.024624	0.0859754
Lipid	GM3 16:0	13 ± 2	7 ± 1 *	-0.450888	0.0111758	0.0527006
Lipid	GM3 22:0	13 ± 2	14 ± 1	0.0793615	0.664774	0.742298
Lipid	GM3 24:1	22 ± 3	14 ± 2 *	-0.389737	0.0372589	0.105141
Lipid	SM 33:1	57 ± 4	49 ± 7	-0.132357	0.380762	0.529979
Lipid	SM 34:1	1512 ± 157	1239 ± 112	-0.180525	0.164315	0.304946
Lipid	SM 34:2	46 ± 5	35 ± 8	-0.245298	0.278521	0.428174
Lipid	SM 36:1	225 ± 23	197 ± 15	-0.127441	0.297119	0.450048
Lipid	SM 36:2	110 ± 10	126 ± 12	0.14165	0.335515	0.487156
Lipid	SM 39:1	186 ± 14	203 ± 13	0.0930845	0.394571	0.544328
Lipid	SM 41:1	942 ± 55	959 ± 83	0.0185628	0.869953	0.900555
Lipid	SM 41:2	484 ± 31	339 ± 30 †	-0.300079	0.00404641	0.0252594
Lipid	SM 42:1	858 ± 57	974 ± 82	0.135353	0.284168	0.43362
Lipid	PC 28:0	13 ± 2	48 ± 39	2.7307	0.429568	0.563637
Lipid	PC 30:0	268 ± 30	193 ± 16 *	-0.279822	0.0326148	0.0953424
Lipid	PC 32:0	1995 ± 294	1411 ± 113	-0.292805	0.0612476	0.145023
Lipid	PC 32:1	7877 ± 444	8196 ± 656	0.040486	0.708196	0.784347
Lipid	PC 32:2	1528 ± 131	1306 ± 120	-0.145138	0.230754	0.370067
Lipid	PC 32:3	52 ± 4	42 ± 4	-0.186381	0.0970913	0.206194
Lipid	PC 34:0	255 ± 28	222 ± 22	-0.129151	0.365094	0.515133
Lipid	PC 34:1	37515 ± 2053	41114 ± 4056	0.0959371	0.474466	0.595975
Lipid	PC 34:2	24518 ± 1327	24700 ± 2803	0.00739448	0.957711	0.971864
Lipid	PC 34:3	2897 ± 201	2593 ± 216	-0.104909	0.327615	0.485529
Lipid	PC 34:4	451 ± 35	392 ± 35	-0.129885	0.261116	0.407499
Lipid	PC 34:5	31 ± 3	27 ± 2	-0.109139	0.410158	0.550279
Lipid	PC 36:1	4482 ± 231	4389 ± 386	-0.0209268	0.847557	0.886278
Lipid	PC 36:2	10024 ± 438	7842 ± 633 *	-0.217654	0.0161368	0.0651799
Lipid	PC 36:3	14690 ± 753	11484 ± 909 *	-0.218247	0.018364	0.0713772
Lipid	PC 36:4	16702 ± 795	16693 ± 1741	-0.000580762	0.996367	0.996367
Lipid	PC 36:5	3017 ± 160	3274 ± 314	0.0850514	0.510308	0.622033
Lipid	PC 36:6	595 ± 34	614 ± 58	0.0318074	0.796319	0.849957
Lipid	PC 38:3	3543 ± 278	2421 ± 205 †	-0.316699	0.0043391	0.0262181
Lipid	PC 38:4	4970 ± 282	4553 ± 430	-0.0840191	0.454756	0.585498
Lipid	PC 38:5	9111 ± 405	8682 ± 729	-0.0471094	0.63818	0.733551
Lipid	PC 38:6b	21448 ± 1074	21766 ± 2288	0.0147985	0.909375	0.931996
Lipid	PC 38:7	1314 ± 78	1230 ± 106	-0.0639075	0.550537	0.644378
Lipid	PC 39:6	632 ± 35	509 ± 40 *	-0.194776	0.0397435	0.108251
Lipid	PC 40:6	2827 ± 139	2721 ± 244	-0.0373554	0.730538	0.796247
Lipid	PC 40:7	3664 ± 212	3152 ± 310	-0.139761	0.214189	0.355831
Lipid	PC(O-30:0)	7 ± 1	5 ± 0	-0.266412	0.191593	0.326183
Lipid	PC(O-32:0)	78 ± 15	50 ± 5	-0.359462	0.0609533	0.145023
Lipid	PC(O-32:1)	18 ± 5	9 ± 1	-0.504328	0.0502285	0.124663
Lipid	PC(O-34:0)	8 ± 1	7 ± 1	-0.0147673	0.937721	0.95629
Lipid	PC(O-34:1)	176 ± 35	106 ± 8 *	-0.396735	0.0460678	0.11716
Lipid	PC(O-36:3)	329 ± 37	196 ± 13 †	-0.404354	0.00204489	0.0191476
Lipid	PC(O-36:4)	118 ± 26	87 ± 7	-0.265729	0.218836	0.356611
Lipid	PC(O-38:5)	226 ± 43	128 ± 12 *	-0.432466	0.0265119	0.0895321
Lipid	PC(P-32:0)	8 ± 1	7 ± 1	-0.0943566	0.640967	0.733551
Lipid	PC(P-38:5)	70 ± 7	59 ± 5	-0.16766	0.177924	0.318716
Lipid	PC(P-40:5)	21 ± 1	16 ± 2	-0.249149	0.0755849	0.173005
Lipid	LPC 14:0	10 ± 1	6 ± 1	-0.354775	0.0710858	0.164536
Lipid	LPC 16:0	1149 ± 101	1707 ± 659	0.485858	0.46582	0.589584
Lipid	LPC 16:1	85 ± 12	65 ± 8	-0.233284	0.188979	0.326183
Lipid	LPC 18:0	306 ± 26	259 ± 18	-0.151636	0.150143	0.288859
Lipid	LPC 18:2	138 ± 20	106 ± 16	-0.230937	0.217198	0.356611
Lipid	LPC 20:0	5 ± 0	4 ± 0	-0.096766	0.219853	0.356611
Lipid	LPC 20:1	10 ± 1	5 ± 1 †	-0.514159	0.00183602	0.0180104
Lipid	LPC 20:4	121 ± 18	92 ± 11	-0.240635	0.169285	0.308609
Lipid	LPC 20:5	10 ± 2	9 ± 1	-0.124923	0.53589	0.638111
Lipid	LPC 22:6	220 ± 29	165 ± 20	-0.24882	0.128589	0.257177
Lipid	PE 32:0	78 ± 9	70 ± 7	-0.102352	0.466515	0.589584
Lipid	PE 32:1	358 ± 39	325 ± 29	-0.0924591	0.497304	0.613441
Lipid	PE 34:1	1127 ± 88	1127 ± 85	-0.000709597	0.995229	0.996367
Lipid	PE 34:2	1950 ± 187	1843 ± 129	-0.0546723	0.634321	0.733551
Lipid	PE 34:3	298 ± 41	252 ± 22	-0.155139	0.310983	0.46761
Lipid	PE 35:1	11 ± 2	9 ± 1	-0.166366	0.402994	0.546163
Lipid	PE 35:2	130 ± 12	102 ± 9	-0.214912	0.0710323	0.164536
Lipid	PE 36:0	11 ± 1	11 ± 1	-0.0458841	0.766743	0.826959
Lipid	PE 36:1	269 ± 11	277 ± 15	0.0327155	0.648769	0.73441
Lipid	PE 36:2	1124 ± 80	990 ± 67	-0.119169	0.214092	0.355831
Lipid	PE 36:3	2433 ± 187	2018 ± 141	-0.170489	0.0900635	0.197373
Lipid	PE 36:4	6148 ± 331	5961 ± 385	-0.0303523	0.725952	0.796247
Lipid	PE 36:5	1132 ± 86	1149 ± 89	0.015015	0.894721	0.921562
Lipid	PE 38:3	395 ± 44	323 ± 26	-0.18125	0.166311	0.305894
Lipid	PE 38:4	6976 ± 314	7075 ± 435	0.0142208	0.862338	0.89718
Lipid	PE 38:5	6506 ± 247	6048 ± 385	-0.0704723	0.359451	0.514215
Lipid	PE 38:6	10826 ± 370	10446 ± 711	-0.035164	0.66583	0.742298
Lipid	PE 40:5	97 ± 9	65 ± 9 *	-0.323452	0.027673	0.0904863
Lipid	PE 40:6	2106 ± 96	2052 ± 118	-0.0253122	0.739973	0.802287
Lipid	PE 40:7	2677 ± 111	2299 ± 164	-0.141443	0.0881495	0.195256
Lipid	PE(O-34:1)	8 ± 2	5 ± 1	-0.32411	0.200012	0.337726
Lipid	PE(O-36:2)	28 ± 3	19 ± 3	-0.295313	0.0770986	0.174531
Lipid	PE(O-36:3)	42 ± 6	34 ± 3	-0.199871	0.171897	0.310621
Lipid	PE(O-36:4)	13 ± 3	10 ± 1	-0.241313	0.274983	0.425913
Lipid	PE(O-38:4)	20 ± 4	17 ± 2	-0.172526	0.438816	0.572127
Lipid	PE(O-38:5)	100 ± 8	94 ± 7	-0.0689322	0.508385	0.622033
Lipid	PE(O-40:5)	117 ± 8	98 ± 6	-0.160899	0.0798499	0.178794
Lipid	PE(O-40:6)	328 ± 16	252 ± 14 †	-0.230398	0.00260933	0.0206739
Lipid	PE(O-40:7)	10 ± 1	7 ± 1 *	-0.301872	0.0428142	0.113073
Lipid	PE(P-36:2)	19 ± 3	18 ± 2	-0.0545134	0.771787	0.828063
Lipid	PE(P-36:4)	28 ± 5	22 ± 2	-0.239631	0.161183	0.301851
Lipid	PE(P-38:4)	30 ± 3	25 ± 2	-0.173912	0.191539	0.326183
Lipid	PE(P-38:5)	41 ± 5	26 ± 2 †	-0.37897	0.00821648	0.0423149
Lipid	PE(P-38:6)	16 ± 2	14 ± 1	-0.119195	0.341773	0.492344
Lipid	PE(P-40:5)	15 ± 2	14 ± 2	-0.0309314	0.845061	0.886278
Lipid	PE(P-40:6)	8 ± 1	5 ± 0 †	-0.355462	0.00380689	0.0248778
Lipid	PI 32:1	119 ± 24	66 ± 8 *	-0.449971	0.0368931	0.105141
Lipid	PI 34:1	417 ± 83	281 ± 39	-0.324795	0.136206	0.269793
Lipid	PI 36:1	183 ± 39	88 ± 11 *	-0.515912	0.0205567	0.0784201
Lipid	PI 36:2	1218 ± 220	632 ± 80 *	-0.48141	0.0148383	0.0621568
Lipid	PI 36:3	4041 ± 687	2293 ± 329 *	-0.432523	0.0261987	0.0895321
Lipid	PI 36:4	3500 ± 439	3066 ± 527	-0.123925	0.549653	0.644378
Lipid	PI 38:2	280 ± 57	172 ± 31	-0.383758	0.0989946	0.208091
Lipid	PI 38:3	10230 ± 2033	4935 ± 648 *	-0.517591	0.0150866	0.0621568
Lipid	PI 38:4	20823 ± 2673	16791 ± 2749	-0.193622	0.316261	0.4721
Lipid	PI 38:5	6241 ± 778	4348 ± 797	-0.303272	0.113784	0.234395
Lipid	PI 38:6	396 ± 57	258 ± 34 *	-0.349353	0.0443224	0.114882
Lipid	PI 40:4	283 ± 48	173 ± 22 *	-0.387346	0.0399372	0.108251
Lipid	PI 40:5	366 ± 51	297 ± 46	-0.187232	0.335807	0.487156
Lipid	PI 40:6	449 ± 78	262 ± 32 *	-0.41621	0.0290035	0.0907799
Lipid	PS 36:1	269 ± 49	239 ± 19	-0.112495	0.541755	0.641388
Lipid	PS 36:2	146 ± 21	129 ± 9	-0.122148	0.411373	0.550279
Lipid	PS 38:3	440 ± 39	421 ± 26	-0.0447331	0.666627	0.742298
Lipid	PS 38:4	1570 ± 155	1803 ± 116	0.148188	0.23741	0.376203
Lipid	PS 38:5	580 ± 76	639 ± 44	0.102622	0.487112	0.607791
Lipid	PS 40:5	365 ± 37	376 ± 29	0.0286371	0.821978	0.868346
Lipid	PS 40:6	1253 ± 86	1493 ± 111	0.192176	0.119637	0.241621
Lipid	PG 34:1	285 ± 11	299 ± 18	0.0510011	0.52719	0.631402
Lipid	PG 34:2	14 ± 2	13 ± 1	-0.0535777	0.729741	0.796247
Lipid	PG 36:1	14 ± 2	12 ± 1	-0.164303	0.332474	0.487156
Lipid	PG 36:2	34 ± 3	28 ± 2	-0.185968	0.115356	0.23528
Lipid	BMP 18:1/18:1	715 ± 93	389 ± 39 †	-0.455819	0.00307104	0.0219909
Lipid	CE 14:0	4610 ± 553	1602 ± 230 †	-0.652466	5.60322e-05	0.00431514
Lipid	CE 15:0	2619 ± 472	812 ± 191 †	-0.690142	0.00143695	0.0177441
Lipid	CE 16:0	33579 ± 4726	15554 ± 2117 †	-0.536801	0.00179604	0.0180104
Lipid	CE 16:1	138641 ± 22823	51330 ± 7417 †	-0.629764	0.00106308	0.0177441
Lipid	CE 16:2	742 ± 127	256 ± 55 †	-0.654799	0.00163659	0.0177441
Lipid	CE 17:0	4471 ± 653	1899 ± 309 †	-0.575263	0.00155381	0.0177441
Lipid	CE 17:1	3985 ± 676	1628 ± 266 †	-0.591568	0.00286717	0.0218754
Lipid	CE 18:0	915 ± 123	562 ± 77 *	-0.385233	0.0220287	0.0806835
Lipid	CE 18:1	39083 ± 5215	17560 ± 2439 †	-0.550703	0.00103113	0.0177441
Lipid	CE 18:2	6306 ± 1057	3354 ± 546 *	-0.468134	0.0181116	0.0713772
Lipid	CE 18:3	930 ± 123	454 ± 84 †	-0.511854	0.00451996	0.0262181
Lipid	CE 20:3	301 ± 39	177 ± 25 *	-0.412074	0.0139221	0.0610205
Lipid	CE 20:4	1118 ± 263	937 ± 121	-0.161517	0.514024	0.622876
Lipid	CE 22:1	180 ± 20	53 ± 16 †	-0.70631	0.000108831	0.00560478
Lipid	CE 22:6	1472 ± 117	852 ± 213 *	-0.420714	0.0306542	0.0926187
Lipid	COH	30948 ± 3708	25107 ± 3339	-0.188759	0.259143	0.407499
Lipid	DG 14:0/18:1	3463 ± 463	2688 ± 417	-0.22373	0.231741	0.370067
Lipid	DG 14:0/18:2	431 ± 57	369 ± 70	-0.143092	0.517898	0.6239
Lipid	DG 14:1/16:0	587 ± 66	514 ± 58	-0.123721	0.423069	0.562272
Lipid	DG 16:0/18:1	34952 ± 3529	27514 ± 3393	-0.212818	0.151441	0.288859
Lipid	DG 16:0/18:2	5973 ± 525	5355 ± 582	-0.103499	0.452581	0.585498
Lipid	DG 16:0/20:3	534 ± 74	340 ± 35 *	-0.363027	0.0223251	0.0806835
Lipid	DG 16:0/22:6	2490 ± 347	1898 ± 202	-0.237638	0.141869	0.275707
Lipid	DG 16:1/18:1	21118 ± 2786	13682 ± 2340	-0.352082	0.0562017	0.137828
Lipid	DG 18:1/18:1	25052 ± 2360	16478 ± 2590 *	-0.342243	0.0295255	0.0907799
Lipid	DG 18:1/18:2	5584 ± 486	4206 ± 726	-0.246745	0.155389	0.29367
Lipid	DG 18:1/18:3	938 ± 109	701 ± 127	-0.252123	0.188776	0.326183
Lipid	DG 18:1/20:3	1237 ± 114	783 ± 108 *	-0.366696	0.0112564	0.0527006
Lipid	DG 18:1/20:4	1053 ± 114	841 ± 101	-0.201291	0.183165	0.325276
Lipid	DG 18:2/18:2	240 ± 19	203 ± 40	-0.15237	0.46218	0.589584
Lipid	TG 14:0/16:0/18:1	9887 ± 1312	6477 ± 1054	-0.344925	0.0569048	0.13791
Lipid	TG 14:0/16:0/18:2	25400 ± 3748	14920 ± 2313 *	-0.412576	0.0245735	0.0859754
Lipid	TG 14:0/16:1/18:1	17421 ± 2295	9803 ± 1609 *	-0.437284	0.0129574	0.0593163
Lipid	TG 14:0/16:1/18:2	1565 ± 216	941 ± 157 *	-0.39885	0.0294011	0.0907799
Lipid	TG 14:0/17:0/18:1	2836 ± 367	1809 ± 294 *	-0.362005	0.0418559	0.111978
Lipid	TG 14:0/18:0/18:1	258 ± 30	142 ± 19 †	-0.448254	0.00386452	0.0248778
Lipid	TG 14:0/18:2/18:2	292 ± 33	182 ± 30 *	-0.375282	0.0274443	0.0904863
Lipid	TG 14:1/16:0/18:1	7479 ± 1060	4648 ± 797 *	-0.378551	0.0446144	0.114882
Lipid	TG 14:1/16:1/18:0	49611 ± 7922	27626 ± 4405 *	-0.443149	0.0211433	0.0791914
Lipid	TG 14:1/18:0/18:2	1767 ± 242	819 ± 170 †	-0.536428	0.0045818	0.0262181
Lipid	TG 14:1/18:1/18:1	12806 ± 1778	5940 ± 923 †	-0.536198	0.00222133	0.0198722
Lipid	TG 15:0/16:0/18:1	2657 ± 426	1742 ± 311	-0.344347	0.0946572	0.203119
Lipid	TG 15:0/18:1/18:1	2401 ± 235	1278 ± 178 †	-0.467891	0.00130695	0.0177441
Lipid	TG 16:0/16:0/16:0	1470 ± 173	1150 ± 156	-0.217906	0.188512	0.326183
Lipid	TG 16:0/16:0/18:1	29529 ± 3218	19518 ± 2778 *	-0.33902	0.0310228	0.0926187
Lipid	TG 16:0/16:0/18:2	2720 ± 290	2058 ± 302	-0.243328	0.140134	0.27493
Lipid	TG 16:0/16:1/17:0	5535 ± 746	3564 ± 575 *	-0.356123	0.0490384	0.123194
Lipid	TG 16:0/16:1/18:1	97150 ± 10256	55317 ± 7414 †	-0.430602	0.00374858	0.0248778
Lipid	TG 16:0/17:0/18:1	1347 ± 155	805 ± 112 *	-0.402391	0.0104937	0.0514693
Lipid	TG 16:0/17:0/18:2	6461 ± 617	3685 ± 487 †	-0.429642	0.00248295	0.0204595
Lipid	TG 16:0/18:0/18:1	2169 ± 198	1425 ± 157 †	-0.343154	0.00861337	0.0432769
Lipid	TG 16:0/18:1/18:1	130524 ± 10856	73831 ± 9649 †	-0.43435	0.00125711	0.0177441
Lipid	TG 16:0/18:1/18:2	18175 ± 1085	11639 ± 1557 †	-0.359612	0.00481606	0.0268138
Lipid	TG 16:0/18:2/18:2	2205 ± 153	1575 ± 217 *	-0.286038	0.0384846	0.107133
Lipid	TG 16:1/16:1/16:1	7094 ± 1371	3253 ± 592 *	-0.54154	0.0136676	0.0610205
Lipid	TG 16:1/16:1/18:0	644 ± 92	337 ± 54 †	-0.477577	0.00787143	0.0415773
Lipid	TG 16:1/16:1/18:1	23860 ± 3271	11337 ± 1678 †	-0.524845	0.0023152	0.0198722
Lipid	TG 16:1/17:0/18:1	11325 ± 1088	6076 ± 814 †	-0.463476	0.00115545	0.0177441
Lipid	TG 16:1/18:1/18:1	30022 ± 3220	13082 ± 1765 †	-0.564246	0.000170768	0.00687605
Lipid	TG 16:1/18:1/18:2	8095 ± 741	4292 ± 595 †	-0.469813	0.00092812	0.0177441
Lipid	TG 17:0/18:1/18:1	2998 ± 280	1462 ± 192 †	-0.512508	0.000256217	0.00754009
Lipid	TG 18:0/18:1/18:1	2142 ± 269	876 ± 101 †	-0.59092	0.000200273	0.00687605
Lipid	TG 18:0/18:2/18:2	1026 ± 76	581 ± 84 †	-0.433821	0.00146674	0.0177441
Lipid	TG 18:1/18:1/18:1	31499 ± 3672	11295 ± 1408 †	-0.641433	4.17404e-05	0.00431514
Lipid	TG 18:1/18:1/18:2	1261 ± 122	525 ± 74 †	-0.583496	6.28418e-05	0.00431514
Lipid	TG 18:1/18:1/20:4	496 ± 27	303 ± 37 †	-0.389684	0.000906345	0.0177441
Lipid	TG 18:1/18:1/22:6	828 ± 56	514 ± 67 †	-0.379438	0.00309581	0.0219909
Lipid	TG 18:1/18:2/18:2	1786 ± 119	1013 ± 138 †	-0.432643	0.000805058	0.0177441
Lipid	TG 18:2/18:2/18:2	56 ± 4	37 ± 5 *	-0.334143	0.0149146	0.0621568
Total	Total Cer	1.2 ± 0.1	1 ± 0.1	-0.148441	0.173058	0.288429
Total	Total MHC	0.67 ± 0.09	0.57 ± 0.05	-0.143428	0.334356	0.460573
Total	Total DHC	0.04 ± 0.006	0.03 ± 0.004	-0.280106	0.102295	0.204591
Total	Total GM3	0.05 ± 0.007	0.03 ± 0.004	-0.280055	0.0839629	0.204591
Total	Total SM	4.42 ± 0.2	4.12 ± 0.33	-0.0677061	0.47038	0.587975
Total	Total PC	174 ± 7	170 ± 16	-0.0277867	0.798254	0.840268
Total	Total PC(O)	1 ± 0	1 ± 0 *	-0.386708	0.0191676	0.0766704
Total	Total PC(P)	0 ± 0	0 ± 0	-0.179056	0.14735	0.267909
Total	Total LPC	2 ± 0	2 ± 1	0.177905	0.653883	0.726537
Total	Total PE	45 ± 2	42 ± 3	-0.049487	0.510383	0.600451
Total	Total PE(O)	1 ± 0	1 ± 0 *	-0.195462	0.0100894	0.0504472
Total	Total PE(P)	0 ± 0	0 ± 0 *	-0.215847	0.0488223	0.162741
Total	Total PI	49 ± 7	34 ± 5	-0.306549	0.100261	0.204591
Total	Total PS	5 ± 0	5 ± 0	0.102846	0.34543	0.460573
Total	Total PG	0 ± 0	0 ± 0	0.0147567	0.840314	0.840314
Total	Total BMP	1 ± 0	0 ± 0 †	-0.455819	0.00307104	0.0204736
Total	Total CE	239 ± 36	97 ± 13.7 †	-0.593939	0.00103939	0.0204736
Total	Total COH	30.9 ± 3.7	25.1 ± 3.3	-0.188759	0.259143	0.398682
Total	Total DG	103.6 ± 10.4	75.6 ± 10.6	-0.270876	0.0819588	0.204591
Total	Total TG	554.8 ± 58	305.9 ± 41.1 †	-0.448673	0.0024063	0.0204736
